# Supplementary material for: Insight into the Global Negative Regulation of Iron Scavenger 7-HT Biosynthesis by the SigW/RsiW System in Pseudomonas donghuensis HYS
Source: MDPI journal article supplement (doi:10.3390/ijms24021184), 2023-01-07
Supplement: s1 [file s1]

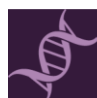

## Supplementary Materials

**Table S1.** Bacterial strains and plasmids used in this study

| Strains and Plasmids                                                 | Description                                                                                                                                                                   | Source           |
|----------------------------------------------------------------------|-------------------------------------------------------------------------------------------------------------------------------------------------------------------------------|------------------|
| <i>Escherichia coli</i>                                              |                                                                                                                                                                               |                  |
| DH5α                                                                 | F- $\phi$ 80 <i>lacZ</i> $\Delta$ M15 $\Delta$ ( <i>lacZYA-argF</i> ) U169 <i>recA1</i><br><i>endA1 hsdR17(rk-, mk+)</i> <i>phoA supE44 thi-1</i><br><i>gyrA96 relA1 tonA</i> | Laboratory stock |
| BL21                                                                 | F- <i>ompT hsdSB (rB-mB-)</i> <i>gal dcm</i> (DE3)                                                                                                                            | Laboratory stock |
| S17-1 $\lambda$ pir                                                  | <i>thi pro hsdR recA</i> ; chromosomal RP4–2;<br>(Tc::Mu) (Km::Tn7) T <sup>r</sup> Sp <sup>r</sup>                                                                            | Laboratory stock |
| <i>Pseudomonas donghuensis</i>                                       |                                                                                                                                                                               |                  |
| HYS                                                                  | <i>P.donghuensis</i> wild-type strain                                                                                                                                         | Laboratory stock |
| $\Delta$ <i>sigW</i>                                                 | <i>sigW</i> derivative of HYS                                                                                                                                                 | This study       |
| $\Delta$ <i>rsiW</i>                                                 | <i>rsiW</i> derivative of HYS                                                                                                                                                 | This study       |
| $\Delta$ <i>sigW</i> $\Delta$ <i>rsiW</i>                            | <i>sigW</i> and <i>rsiW</i> derivative of HYS                                                                                                                                 | This study       |
| $\Delta$ <i>sigW</i> $\Delta$ <i>rsiW</i> (pBBR1-MCS2- <i>sigW</i> ) | <i>sigW</i> overexpression of <i>sigW</i> and <i>rsiW</i><br>deletion mutant                                                                                                  | This study       |
| HYS/pBBR1-MCS2                                                       | pBBR2 expression of HYS                                                                                                                                                       | This study       |
| HYS/pBBR1-MCS2- <i>sigW</i>                                          | <i>sigW</i> overexpression of HYS                                                                                                                                             | This study       |
| HYS/pBBR1-MCS2- <i>rsiW</i>                                          | <i>rsiW</i> overexpression of HYS                                                                                                                                             | This study       |
| HYS/pBBR5Z- <i>Porf9-6</i>                                           | HYS containing pBBR5Z- <i>Porf9-6</i>                                                                                                                                         | Yu, 2014[1]      |
| HYS/pBBR5Z- <i>Porf1</i>                                             | HYS containing pBBR5Z- <i>Porf1</i>                                                                                                                                           | Yu, 2014[1]      |
| HYS/pBBR5Z- <i>Porf12</i>                                            | HYS containing pBBR5Z- <i>Porf12</i>                                                                                                                                          | Yu, 2014[1]      |
| $\Delta$ <i>sigW</i> /pBBR5Z- <i>Porf9-6</i>                         | $\Delta$ <i>sigW</i> containing pBBR5Z- <i>Porf9-6</i>                                                                                                                        | This study       |
| $\Delta$ <i>sigW</i> /pBBR5Z- <i>Porf1</i>                           | $\Delta$ <i>sigW</i> containing pBBR5Z- <i>Porf1</i>                                                                                                                          | This study       |
| $\Delta$ <i>sigW</i> /pBBR5Z- <i>Porf12</i>                          | $\Delta$ <i>sigW</i> containing pBBR5Z- <i>Porf12</i>                                                                                                                         | This study       |
| Plasmids                                                             |                                                                                                                                                                               |                  |
| pBBR1-MCS2                                                           | Ka <sup>R</sup> , oriREP, gene expression vector                                                                                                                              | Laboratory stock |
| pET41a(+)                                                            | Ka <sup>R</sup> , ori ColE1/pMB1/pBR322/pUC, gene<br>expression vector                                                                                                        | Laboratory stock |
| pBBR1-MCS2- <i>sigW</i>                                              | <i>sigW</i> overexpression in the pBBR1-MCS2, Ka <sup>R</sup>                                                                                                                 | This study       |
| pBBR5Z- <i>Porf9-6</i>                                               | <i>Porf9-6</i> '-' <i>lacZ</i> transcriptional fusion cloned in<br>pBBR5Z; Gm <sup>R</sup>                                                                                    | Yu, 2014[1]      |
| pBBR5Z- <i>Porf1</i>                                                 | <i>Porf1</i> '-' <i>lacZ</i> transcriptional fusion cloned in<br>pBBR5Z; Gm <sup>R</sup>                                                                                      | Yu, 2014[1]      |
| pBBR5Z- <i>Porf12</i>                                                | <i>Porf12</i> '-' <i>lacZ</i> transcriptional fusion cloned in<br>pBBR5Z; Gm <sup>R</sup>                                                                                     | Yu, 2014[1]      |
| pET41a(+)- <i>SigW</i>                                               | Ka <sup>R</sup> , Insert a <i>sigW</i> fragment without stop<br>codon between BamHI and HindIII sites of<br>pET41a(+)                                                         | This study       |
| pEX18Gm- <i>sigW</i>                                                 | Gm <sup>R</sup> , Gene replacement vector for <i>sigW</i>                                                                                                                     | This study       |

Table S2. The whole genome sequence of *P. donghuensis* HYS was uploaded to the P2TF database. Genome-wide search for transcription factors was performed, and  $\sigma$  factor was selected as the screening category with a threshold of 80%[2]. Information of the resulting 35  $\sigma$  factors is shown in the following table, with 20 of them named  $\sigma 1$  to  $\sigma 19$  and *sigW*, respectively.

**Table S2.** The  $\sigma$  factors of *P. donghuensis* HYS

| Gene ID       | Gene Name   | Identity(%)<br>(P2TF) | Type         | Description                                 |
|---------------|-------------|-----------------------|--------------|---------------------------------------------|
| UW3_RS0101765 |             | 81.6                  | Unclassified | sigma-70 family RNA polymerase sigma factor |
| UW3_RS0108825 | $\sigma 1$  | 82.3                  | ECF          | sigma-70 family RNA polymerase sigma factor |
| UW3_RS0125380 | <i>sigW</i> | 84.3                  | ECF          | sigma-70 family RNA polymerase sigma factor |
| UW3_RS0113790 |             | 83.3                  | Unclassified | RNA polymerase sigma factor                 |
| UW3_RS0114990 | $\sigma 2$  | 88.9                  | ECF          | RNA polymerase sigma factor SigX            |
| UW3_RS0120050 | <i>fliA</i> | 88.5                  | RpoD         | RNA polymerase sigma factor FliA            |
| UW3_RS0115575 | $\sigma 3$  | 86.5                  | ECF          | sigma-70 family RNA polymerase sigma factor |
| UW3_RS0124180 | $\sigma 4$  | 84.7                  | ECF          | RNA polymerase sigma factor                 |
| UW3_RS0119060 | $\sigma 5$  | 80.1                  | ECF          | sigma-70 family RNA polymerase sigma factor |
| UW3_RS0106190 | <i>rpoD</i> | 92.3                  | RpoD         | RNA polymerase sigma factor RpoD            |
| UW3_RS0115845 | $\sigma 6$  | 80                    | ECF          | RNA polymerase sigma factor                 |
| UW3_RS0125395 |             | 84.2                  | Unclassified | sigma-70 family RNA polymerase sigma factor |
| UW3_RS0109580 | $\sigma 7$  | 82.1                  | ECF          | sigma-70 family RNA polymerase sigma factor |
| UW3_RS0119320 | <i>rpoS</i> | 87                    | RpoD         | RNA polymerase sigma factor RpoS            |
| UW3_RS0116405 |             | 88.9                  | Unclassified | sigma-70 family RNA polymerase sigma factor |
| UW3_RS0100545 | $\sigma 8$  | 86                    | ECF          | sigma-70 family RNA polymerase sigma factor |
| UW3_RS0113120 | $\sigma 9$  | 81.8                  | ECF          | sigma-70 family RNA polymerase sigma factor |

---

|               |             |      |              |                                             |
|---------------|-------------|------|--------------|---------------------------------------------|
| UW3_RS0113745 | $\sigma 10$ | 82.1 | ECF          | RNA polymerase sigma factor                 |
| UW3_RS0118685 |             | 100  | Unclassified | sigma-70 family RNA polymerase sigma factor |
| UW3_RS0103900 | $\sigma 11$ | 90.5 | ECF          | RNA polymerase sigma factor RpoE            |
| UW3_RS0115310 |             | 89.8 | RpoN         | RNA polymerase factor sigma-54              |
| UW3_RS0121460 |             | 82.7 | Unclassified | sigma-70 family RNA polymerase sigma factor |
| UW3_RS0103755 |             | 83.9 | Unclassified | sigma-70 family RNA polymerase sigma factor |
| UW3_RS0124665 | $\sigma 12$ | 83.8 | ECF          | FecR domain-containing protein              |
| UW3_RS0106005 | $\sigma 13$ | 84.8 | ECF          | RNA polymerase sigma factor                 |
| UW3_RS0125045 |             | 90.9 | Unclassified | Terminase family protein                    |
| UW3_RS0102655 | $\sigma 14$ | 90.8 | ECF          | sigma-70 family RNA polymerase sigma factor |
| UW3_RS0125850 | <i>topA</i> | 95.3 | Unclassified | type I DNA topoisomerase                    |
| UW3_RS0121090 | $\sigma 15$ | 83.7 | ECF          | sigma-70 family RNA polymerase sigma factor |
| UW3_RS0103735 | $\sigma 16$ | 89   | ECF          | sigma-70 family RNA polymerase sigma factor |
| UW3_RS0124670 | $\sigma 17$ | 83.8 | ECF          | RNA polymerase sigma factor                 |
| UW3_RS0122855 | $\sigma 18$ | 88.6 | ECF          | RNA polymerase factor sigma-70              |
| UW3_RS0102630 |             | 85.3 | Unclassified | sigma-70 family RNA polymerase sigma factor |
| UW3_RS0116805 |             | 82.5 | Unclassified | DUF4880 domain-containing protein           |
| UW3_RS0109705 | $\sigma 19$ | 91   | ECF          | RNA polymerase sigma factor RpoH            |

---

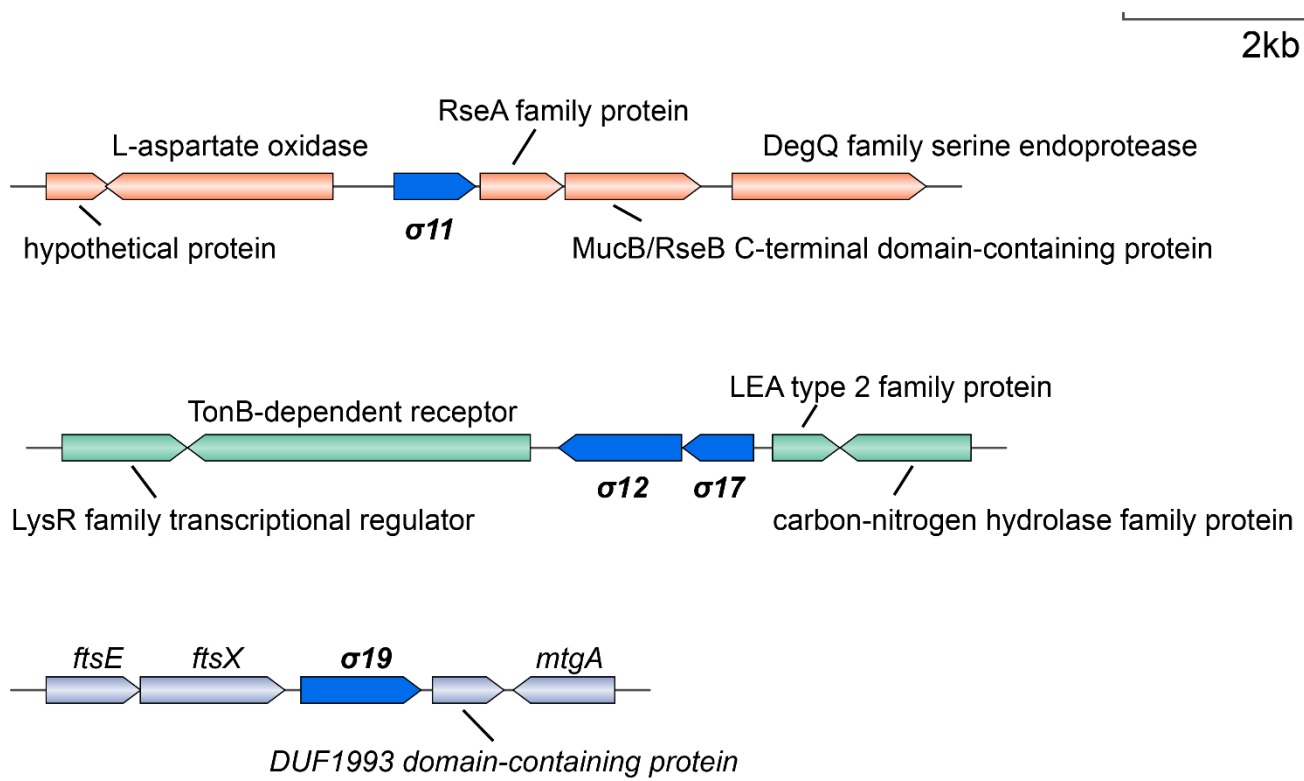

**Figure S1.** Genomic localization map of ECF  $\sigma$  factors regulated by ferrous ions. From top to bottom, the distribution of  $\sigma 11$ ,  $\sigma 12$ ,  $\sigma 17$ , and  $\sigma 19$  on the genome of *P. donghuensis* HYS.

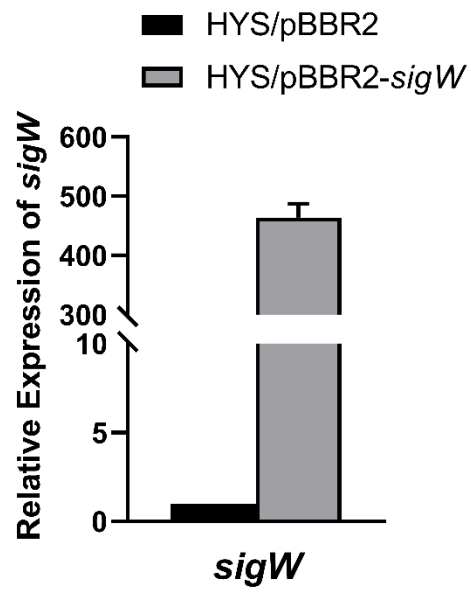

**Figure S2.** Relative expression of *sigW* in HYS/pBBR1-MCS2 and HYS/pBBR1-MCS2-*sigW*. RNA was isolated from the indicated strains grown to the exponential phase at 30 °C in liquid MKB culture. The error bars indicate the mean  $\pm$  SD of three independent experiments.

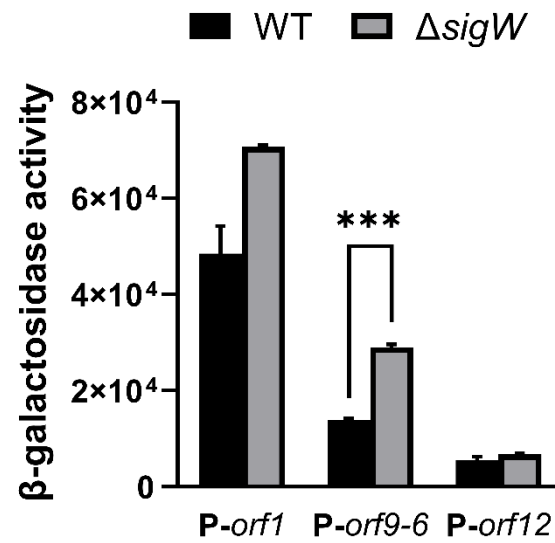

**Figure S3.** SigW is the transcriptional inhibitor of the nonfluorescent siderophore (*nfs*) gene cluster. The promoter activity of *orf1*, *orf9-6*, and *orf12* were measured in wild-type HYS and  $\Delta sigW$  mutant.  $\beta$ -galactosidase activities of the recombinant HYS strains were detected when the *lacZ* gene was driven by various promoters in the pBBR5Z vector. Error bars indicate the mean  $\pm$  SD of three independent experiments. Statistical significance was calculated using one-way ANOVA Dunnett's multiple comparison test, \*\*\* $p < 0.0001$ .

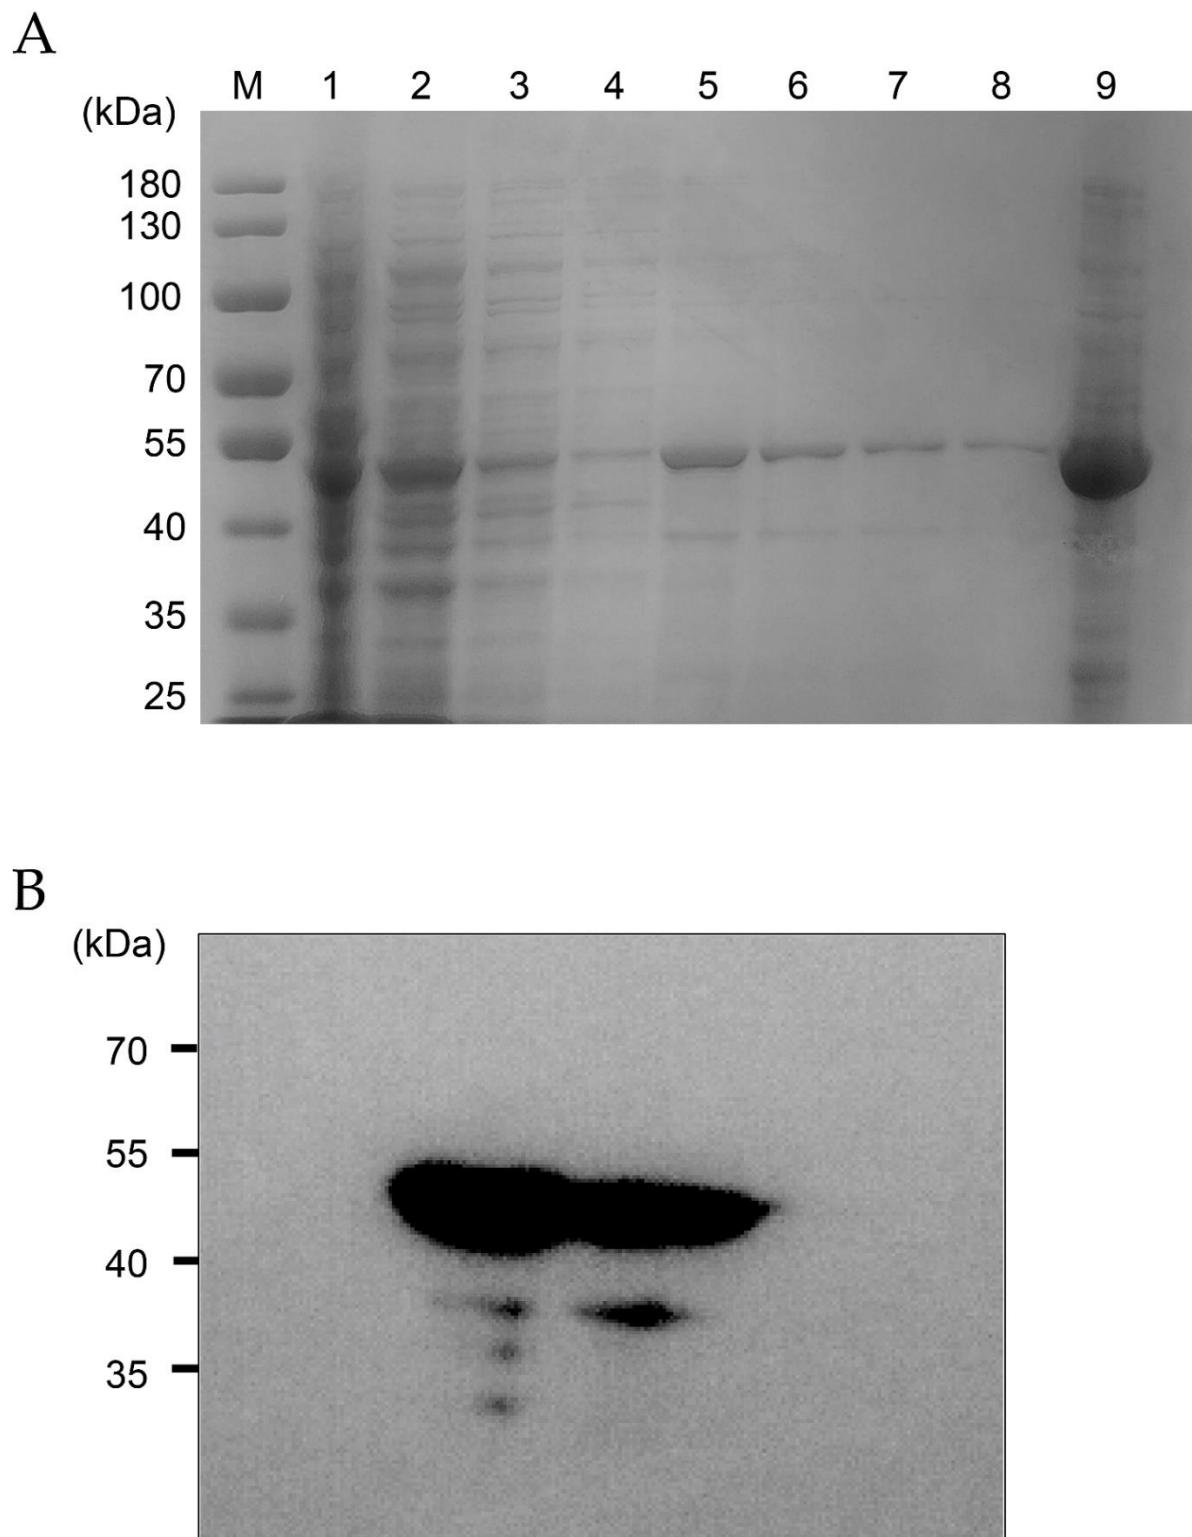

**Figure S4.** Recombinant protein purification. (A) SDS-PAGE analysis of the purified SigW. Marker: Pre-stained Protein Ladder 26616 (Thermo Fisher, USA). Lanes 1–9 are cellular sedimentation, supernatant, wash buffer I, wash buffer II, 10 mM GSH, 33 mM GSH, 40 mM GSH, 40 mM GSH, and Ultrafiltrate protein, respectively; and (B) Western blot analysis of SigW expressed in *E.coli* BL21(DE3). The fusion protein GST-SigW in strain BL21 carrying the plasmid pET41a(+)-SigW was detected by Western blot method with an anti-GST antibody(Abbkine) at 14 h after IPTG induction.

**Table S3.** Oligonucleotide primers used in this study

| <b>Primer</b>      | <b>Primer Sequence (5'-3')</b> | <b>Description</b> |
|--------------------|--------------------------------|--------------------|
| RT- <i>sigW</i> -F | GGGCAGCAACACCGAAGATA           | Real-time qPCR     |
| RT- <i>sigW</i> -R | GCGACAAGCGTGACATTACC           | Real-time qPCR     |
| RT- <i>rsiW</i> -F | TCGGCACTTTACCGGACCTCTC         | Real-time qPCR     |
| RT- <i>rsiW</i> -R | GGGCGTCTTCAAACAACAACAGC        | Real-time qPCR     |
| RT- $\sigma 1$ -F  | CACGCCTTTATCCTGCATCG           | Real-time qPCR     |
| RT- $\sigma 1$ -R  | CTCAGGCAATGCACGAAGG            | Real-time qPCR     |
| RT- $\sigma 2$ -F  | GCCTTGAGTCTTGATCCGCT           | Real-time qPCR     |
| RT- $\sigma 2$ -R  | TCGTAGCACCAGAATCTCGC           | Real-time qPCR     |
| RT- $\sigma 3$ -F  | TCGTTTTCCAGTACCCGCAC           | Real-time qPCR     |
| RT- $\sigma 3$ -R  | GGCTTTCTCGACCACTACCA           | Real-time qPCR     |
| RT- $\sigma 4$ -F  | TAGAGATAGGCCGGGGTGT            | Real-time qPCR     |
| RT- $\sigma 4$ -R  | TTCCTCAAGCACGCGAAAAC           | Real-time qPCR     |
| RT- $\sigma 5$ -F  | TGCTCTATGTCATTCCCGCC           | Real-time qPCR     |
| RT- $\sigma 5$ -R  | TCGCGAACTGGTGAGTTTCC           | Real-time qPCR     |
| RT- $\sigma 6$ -F  | GCAAGTGCTCGCAACCTTAC           | Real-time qPCR     |
| RT- $\sigma 6$ -R  | CACCGTGCTCAGAGAAACCT           | Real-time qPCR     |
| RT- $\sigma 7$ -F  | CGGCCTTCCTCTTACCATT            | Real-time qPCR     |
| RT- $\sigma 7$ -R  | CCTGGATAGCCTCGTGCATC           | Real-time qPCR     |
| RT- $\sigma 8$ -F  | CGGATCTTCATCCTCAGCCG           | Real-time qPCR     |
| RT- $\sigma 8$ -R  | AGTTCCTTCTGAACCGTGCT           | Real-time qPCR     |
| RT- $\sigma 9$ -F  | CGAATAGTGTCGGCATTGCG           | Real-time qPCR     |
| RT- $\sigma 9$ -R  | GTTGAAGAACTGGCTGCGTG           | Real-time qPCR     |
| RT- $\sigma 10$ -F | TCTGCTTGTAGCGGGTCTTG           | Real-time qPCR     |



---

|                    |                        |                |
|--------------------|------------------------|----------------|
| RT- $\sigma 10$ -R | CGATGAGGCGGTACAGGATG   | Real-time qPCR |
| RT- $\sigma 11$ -F | TGTAAGTTCCGAGGATGCGG   | Real-time qPCR |
| RT- $\sigma 11$ -R | TGCCTTCGATCTCATCTCGC   | Real-time qPCR |
| RT- $\sigma 12$ -F | GTAGCGTTGTTGGTCGCTG    | Real-time qPCR |
| RT- $\sigma 12$ -R | GCGATTTGTCCGATGATGCC   | Real-time qPCR |
| RT- $\sigma 13$ -F | ATCAACTCGGCCAGATACGC   | Real-time qPCR |
| RT- $\sigma 13$ -R | CTGAGCCAGGACACTTTCGT   | Real-time qPCR |
| RT- $\sigma 14$ -F | CCAGGAGTTGTTTTGCGCT    | Real-time qPCR |
| RT- $\sigma 14$ -R | GATCAATGGCGATGTTGCCG   | Real-time qPCR |
| RT- $\sigma 15$ -F | ATCTTCGACAGCCTGATGGC   | Real-time qPCR |
| RT- $\sigma 15$ -R | TTCGGCGGTTTTCTCGTAGG   | Real-time qPCR |
| RT- $\sigma 16$ -F | CACGTCCTGGGTCATGTCTG   | Real-time qPCR |
| RT- $\sigma 16$ -R | AACCTGTCGCGGGTTCTATG   | Real-time qPCR |
| RT- $\sigma 17$ -F | GCTGCTCGATCTTCACCAGT   | Real-time qPCR |
| RT- $\sigma 17$ -R | ATGTTGACGTCTCCCGTGTC   | Real-time qPCR |
| RT- $\sigma 18$ -F | ACATCAACTTCGCCACCCTT   | Real-time qPCR |
| RT- $\sigma 18$ -R | GATGTCTTTCTGTGGCACGC   | Real-time qPCR |
| RT- $\sigma 19$ -F | GAAGTGCGGGAGATGGAGAG   | Real-time qPCR |
| RT- $\sigma 19$ -R | TTGTCACTCCAGTCGGCATC   | Real-time qPCR |
| RT- <i>rpoB</i> -F | CGGGAGCGACCAAAGATCAG   | Real-time qPCR |
| RT- <i>rpoB</i> -R | CGTACTCCAGGGCAGCATTG   | Real-time qPCR |
| RT- <i>orf1</i> -F | TTCGTTCCGCATCCCCAT     | Real-time qPCR |
| RT- <i>orf1</i> -R | AACACTCCTTGAGCGTCTGG   | Real-time qPCR |
| RT- <i>orf2</i> -F | CCGCTGCCGTTCTTCAAATTGC | Real-time qPCR |

---

---

|                     |                           |                |
|---------------------|---------------------------|----------------|
| RT- <i>orf2</i> -R  | GATCACCGCCGAAAGCACTACC    | Real-time qPCR |
| RT- <i>orf3</i> -F  | CTTGCCCTCGATCTTCGGTT      | Real-time qPCR |
| RT- <i>orf3</i> -R  | GTTATCCTCGACCAGCACCC      | Real-time qPCR |
| RT- <i>orf4</i> -F  | CAACCAGGAGCAGTGGGTAG      | Real-time qPCR |
| RT- <i>orf4</i> -R  | AAGGCGCAAAAGATTGCCAG      | Real-time qPCR |
| RT- <i>orf5</i> -F  | GGGGATCTTCGAACCCAAG       | Real-time qPCR |
| RT- <i>orf5</i> -R  | TGGTGCCGTAGTGAACCATC      | Real-time qPCR |
| RT- <i>orf6</i> -F  | CATGCGTTCCATCACCATTCAATG  | Real-time qPCR |
| RT- <i>orf6</i> -R  | CAACTGCCACAGGTGCTCGATAC   | Real-time qPCR |
| RT- <i>orf7</i> -F  | GATGATGTCTGGCTGGAAGTCCTTG | Real-time qPCR |
| RT- <i>orf7</i> -R  | GAAACTCGGCTGCACGGTGATC    | Real-time qPCR |
| RT- <i>orf8</i> -F  | GTAAAGCCCCACCAGTCCTC      | Real-time qPCR |
| RT- <i>orf8</i> -R  | GAAACTCTCCTGGACTCCGC      | Real-time qPCR |
| RT- <i>orf9</i> -F  | GAATGCTTGCGGTACAGGGATGG   | Real-time qPCR |
| RT- <i>orf9</i> -R  | AAGTCGTGAAGTTCGGCACCAAG   | Real-time qPCR |
| RT- <i>orf10</i> -F | AGCTTGAACAACTGCATGGC      | Real-time qPCR |
| RT- <i>orf10</i> -R | TGGTGCCACTGACGAAAGAA      | Real-time qPCR |
| RT- <i>orf11</i> -F | CCTGTGGCTACGAAGACCTTGAAG  | Real-time qPCR |
| RT- <i>orf11</i> -R | CCAGGCGAGTGATCTGCTTGTC    | Real-time qPCR |
| RT- <i>orf12</i> -F | TACACCGAGCCGACACTAACCC    | Real-time qPCR |
| RT- <i>orf12</i> -R | TCGAGACCATCCTCAAGACTACCG  | Real-time qPCR |
| RT- <i>gacA</i> -F  | CTTGCGGCTGGAACGACTTGAG    | Real-time qPCR |
| RT- <i>gacA</i> -R  | GGTGCAGGGCTGGATGAAATGG    | Real-time qPCR |
| RT- <i>gacS</i> -F  | GACAGCTCGATTTCACCCA       | Real-time qPCR |

---

|                     |                              |                            |
|---------------------|------------------------------|----------------------------|
| RT- <i>gacS</i> -R  | ATGACGCCACCCGTTATCTG         | Real-time qPCR             |
| RT- <i>rsmY</i> -F  | TGCAGACTGTTTCCCTGACATC       | Real-time qPCR             |
| RT- <i>rsmY</i> -R  | CTTCTTACATGGACGTAGCGCA       | Real-time qPCR             |
| RT- <i>rsmZ</i> -F  | ACTGACACAGGCTTTCAAGGATGAG    | Real-time qPCR             |
| RT- <i>rsmZ</i> -R  | TTCCGTAGTCCCTTTGTTCCCTTTC    | Real-time qPCR             |
| p1-F                | TCAATGGCGATCAGTACCGAGC       | EMSA                       |
| p1-R                | TATCCGGAAAGTGCATGGTAAGCA     | EMSA                       |
| p2-F                | GATGCTTTTGAGCGCTTATATATACC   | EMSA                       |
| p2-R                | CGAACTCATGGCCTGCCC           | EMSA                       |
| p9-F                | GCCCGCGTATTTCTGAGC           | EMSA                       |
| p9-R                | CGGTGTCAAACCCCTTGTTGC        | EMSA                       |
| p10-F               | GGGCTTGCTGGGTTTTAAATGG       | EMSA                       |
| p10-R               | ATCAACTGCACTCCTTGAGGC        | EMSA                       |
| p12-F               | CCCTACCGTATTTGAACGGC         | EMSA                       |
| p12-R               | CCTCGAGCGGGCTTGTGT           | EMSA                       |
| GSP1                | GCGCGGGCGCGCGACAAGCGTGACATTA | 5'RACE                     |
| GSP2                | GCGCGCAGGCTGGCGTCTTCGCGTTGTT | 5'RACE                     |
| SigW-F              | CGGGATCCAATGAACGAAC TAGAC    | SigW cloning               |
| SigW-R              | CCCAAGCTTTTTCAACCTCCG        | SigW cloning               |
| <i>sigW</i> -up-F   | CGGGATCCACTTGCTGGTAGAA       | Constructing $\Delta sigW$ |
| <i>sigW</i> -up-R   | CGGAATTCTAGTTCGTTCAATTGC     | Constructing $\Delta sigW$ |
| <i>sigW</i> -down-F | CGGAATTCAAATGAGCTTGA         | Constructing $\Delta sigW$ |
| <i>sigW</i> -down-R | CCAAGCTTG TAGGCCGAGA         | Constructing $\Delta sigW$ |
| <i>rsiW</i> -up-F   | CGGAATTCGCCGGTACGA           | Constructing $\Delta rsiW$ |

|                     |                          |                                         |
|---------------------|--------------------------|-----------------------------------------|
| <i>rsiW</i> -up-R   | CGGGATCCGATCAAGCTCATTTTC | Constructing $\Delta$ <i>rsiW</i>       |
| <i>rsiW</i> -down-F | CGGGATCCATCACTTTGTAGCTG  | Constructing $\Delta$ <i>rsiW</i>       |
| <i>rsiW</i> -down-R | CCCAAGCTTGAGATTGATTCT    | Constructing $\Delta$ <i>rsiW</i>       |
| <i>sigW</i> -M-F    | GCTGGCGTAGGTCGTGTTG      | Verification of <i>sigW</i><br>knockout |
| <i>sigW</i> -M-R    | CTTACGCCCCCTAATGGCA      | Verification of <i>sigW</i><br>knockout |
| <i>rsiW</i> -M-F    | GCCCTTGGCGTGATTCTTA      | Verification of <i>rsiW</i><br>knockout |
| <i>rsiW</i> -M-R    | CACCTGGATGGATTAGACTCAA   | Verification of <i>rsiW</i><br>knockout |

<sup>a</sup> Restriction sites displayed in underline.

1. Yu, X.; Chen, M.; Jiang, Z.; Hu, Y.; Xie, Z. The two-component regulators GacS and GacA positively regulate a nonfluorescent siderophore through the Gac/Rsm signaling cascade in high-siderophore-yielding *Pseudomonas* sp. strain HYS. *J Bacteriol* **2014**, *196*, 3259-3270. <https://dx.doi.org/10.1128/JB.01756-14>
2. Ortet, P.; De Luca, G.; Whitworth, D.E.; Barakat, M. P2TF: a comprehensive resource for analysis of prokaryotic transcription factors. *BMC genomics* **2012**, *13*, 628-636. <https://dx.doi.org/10.1186/1471-2164-13-628>
